# Supplementary material for: Grazing elevates litter decomposition but slows nitrogen release in an alpine meadow
Source: Copernicus journal article supplement (doi:10.5194/bg-2018-66), 2018-02-23
Supplement: Supplementary file 1 [file bg-2018-66-supplement.pdf]

**Supplemental Table 1.** The list of all species in grazing and grazing exclusion paddocks (Niu et al., 2009, 2010; Wu et al., 2009).

| Species                             | Palatability | Functional group | Species                       | Palatability | Functional group |
|-------------------------------------|--------------|------------------|-------------------------------|--------------|------------------|
| <i>Agrostis hugoniana</i>           | P            | GG               | <i>Euphorbia esula</i>        | UP           | FG               |
| <i>Agrostis micrantha</i>           | P            | GG               | <i>Euphrasia regelii</i>      | UP           | FG               |
| <i>Allium sikkimense</i>            | P            | FG               | <i>Gentiana macrophylla</i> * | UP           | FG               |
| <i>Astragalus polycladus</i>        | P            | LG               | <i>Gentiana sino-ornata</i>   | UP           | FG               |
| <i>Blysmus sinocompressus</i>       | P            | SG               | <i>Gentianopsis barbata</i>   | UP           | FG               |
| <i>Carex brunnescens</i>            | P            | SG               | <i>Geranium wilfordii</i>     | UP           | FG               |
| <b><i>Elymus nutans</i></b>         | P            | GG               | <i>Halenia elliptica</i>      | UP           | FG               |
| <i>Festuca sinensis</i>             | P            | GG               | <i>Lamiophlomis rotata</i>    | UP           | FG               |
| <i>Gueldenstaedtia diversifolia</i> | P            | LG               | <i>Lancea tibetica</i>        | UP           | FG               |
| <b><i>Kobresia graminifolia</i></b> | P            | SG               | <i>Leontopodium souliei</i>   | UP           | FG               |
| <i>Kobresia humilis</i>             | P            | SG               | <i>Ligularia virgaurea</i>    | UP           | FG               |
| <i>Kobresia kansuensis</i>          | P            | SG               | <i>Oxytropis kansuensis</i>   | UP           | LG               |
| <i>Kobresia tibetica</i>            | P            | SG               | <i>Parnassia palustris</i>    | UP           | FG               |
| <i>Plantago depressa</i>            | P            | FG               | <i>Pleurospermum pulszkyi</i> | UP           | FG               |
| <b><i>Poa chalarantha</i></b>       | P            | GG               | <i>Polygonum viviparum</i>    | UP           | FG               |
| <i>Poa poophagorum</i>              | P            | GG               | <i>Potentilla anserine</i>    | UP           | FG               |
| <i>Potentilla fragarioides</i>      | P            | FG               | <i>Ranunculus tanguticus</i>  | UP           | FG               |
| <b><i>Roegneria nutans</i></b>      | P            | SG               | <i>Rumex patientia</i>        | UP           | FG               |

|                                 |    |    |                                |    |    |
|---------------------------------|----|----|--------------------------------|----|----|
| <i>Scirpus pumilus</i>          | P  | SG | <i>Saussurea hieracoides</i>   | UP | FG |
| <b><i>Stipa aliena</i></b>      | P  | GG | <i>Saussurea pachyneura</i>    | UP | FG |
| <i>Anaphalis lactea</i>         | UP | FG | <i>Saussurea stella</i>        | UP | FG |
| <i>Anemone obtusiloba</i>       | UP | FG | <i>Swertia bimaculata</i>      | UP | FG |
| <b><i>Anemone rioularis</i></b> | UP | FG | <i>Thalicturn alpinum</i>      | UP | FG |
| <i>Anemone trullifolia</i>      | UP | FG | <i>Thermopsis lanceolata</i>   | UP | LG |
| <i>Arenaria serpyllifolia</i>   | UP | FG | <i>Thlaspi arvense</i>         | UP | FG |
| <i>Aster alpinus</i>            | UP | FG | <b><i>Trollius farreri</i></b> | UP | FG |
| <i>Cerastium arvense</i>        | UP | FG | <i>Veronica eriogyne</i>       | UP | FG |
| <i>Cremanthodium lineare</i>    | UP | FG |                                |    |    |

Bold font indicates the dominant species. P, palatable species; UP, unpalatable species; GG, group of grass species; SG, group of sedge species; LG, group of leguminous species; FG, group of forbs species; \**G. macrophylla* presented in GP only.

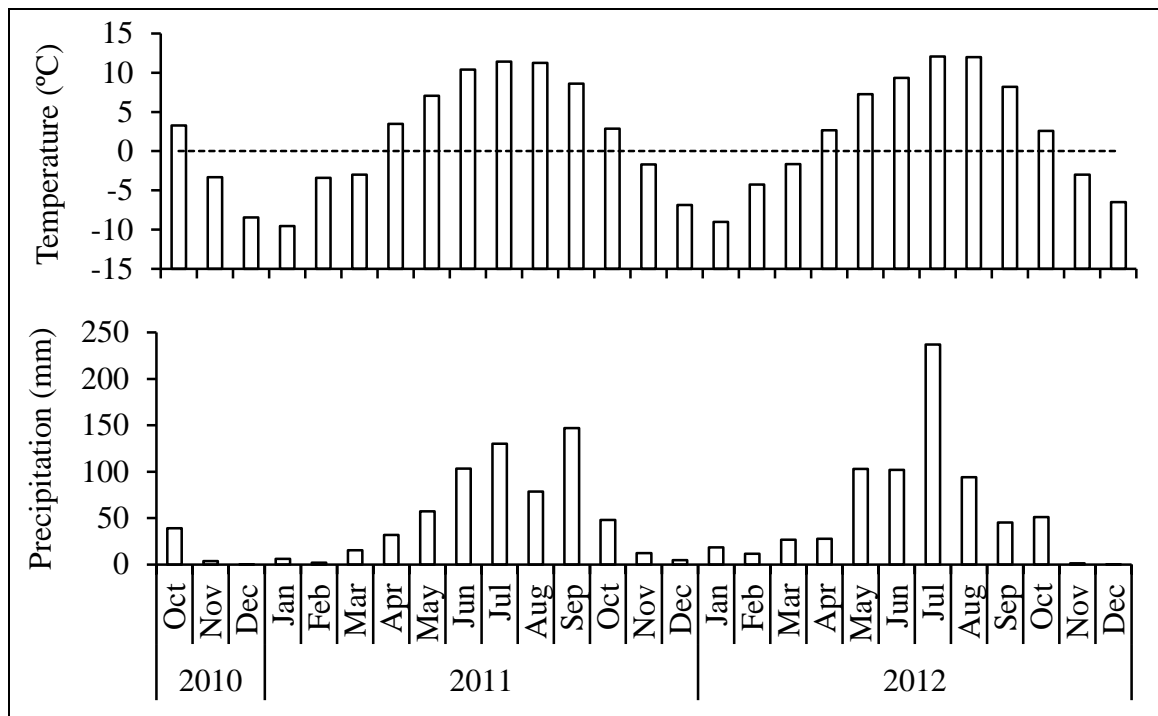

**Figure S1.** Mean temperature (°C) and total precipitation (mm) during the experiment.

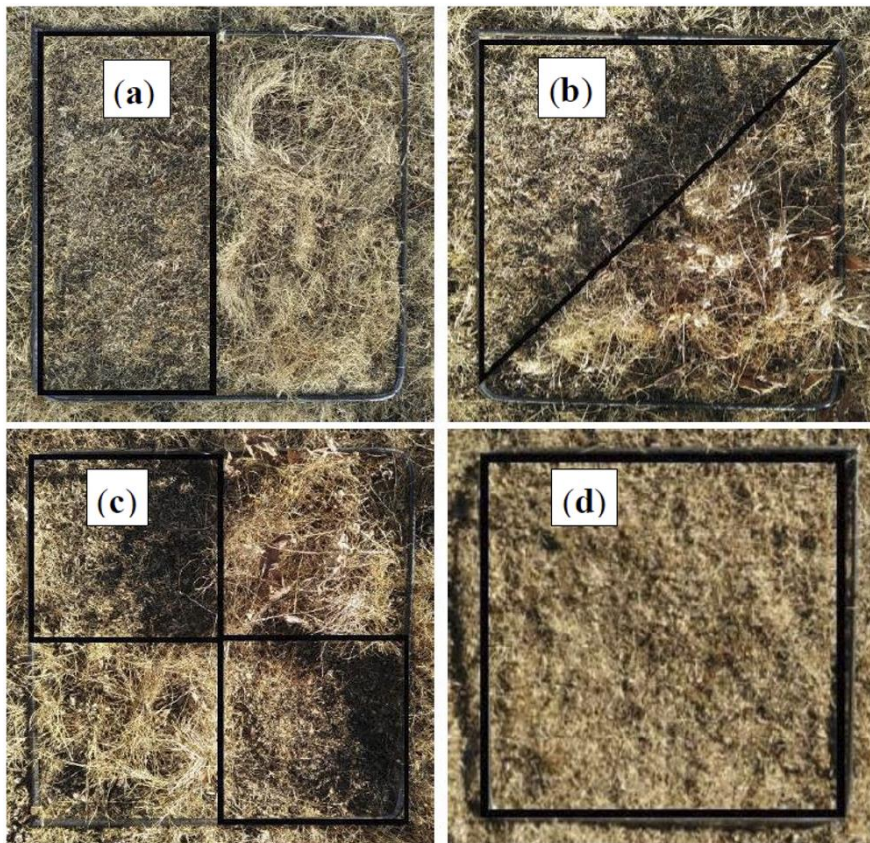

**Figure S2.** Field sampling methods: (a) half alongside, (b) half along diagonal, (c) two sub-quarters along diagonal, and (d) additional quarter for supplementary litter collection to make up 20 g in quarter (a), (b) or (c).
