# Supplementary material for: Grazing elevates litter decomposition but slows nitrogen release in an alpine meadow
Source: Copernicus journal article supplement (doi:10.5194/bg-2018-66), 2018-02-23
Supplement: Supplementary file [file bg-2018-66-AC2-supplement.pdf]

---

1 **Grazing increases litter decomposition rate but decreases nitrogen release**  
2 **rate in an alpine meadow**

3  
4  
5 **Yi Sun<sup>1,3</sup>, Xiong Z. He<sup>2</sup>, Fujiang Hou<sup>1</sup>, Zhaofeng Wang<sup>1</sup>, and Shenghua Chang<sup>1</sup>**

6  
7  
8  
9  
10 <sup>1</sup> State Key Laboratory of Grassland Agro-ecosystems, **Key Laboratory of Grassland Livestock Industry**  
11 **Innovation, Ministry of Agriculture,** College of Pastoral Agriculture Science and Technology, Lanzhou University,  
12 Lanzhou, 730000, Gansu, China

13 <sup>2</sup> School of Agriculture and Environment, College of Science, Massey University, Private Bag 11-222, Palmerston  
14 North, New Zealand

15 <sup>3</sup> State Key Laboratory of Cryospheric Sciences, Cold and Arid Regions Environmental and Engineering  
16 Research Institute, Chinese Academy of Sciences, 320 Donggang West Road, Lanzhou 730000, China

17 *Correspondence to:* Fujiang Hou ([cyhoufj@lzu.edu.cn](mailto:cyhoufj@lzu.edu.cn))

18

19

20

21

22

23

---

24 **Abstract.** Litter decomposition and N release are the key processes that strongly determine the nutrient cycling  
25 at the soil-plant interface; however, how these processes are affected by grazing or grazing exclusion in the alpine  
26 grassland ecosystems on the Qinghai-Tibetan Plateau (QTP) is poorly understood. So far few studies have  
27 simultaneously investigated the influence of both litter quality and incubation site on litter decomposition and N  
28 release. Moreover, previous studies on the QTP investigating how grazing exclusion influences plant abundance  
29 and biodiversity usually lasted for many years, and the short-term effects have rarely been reported. This work  
30 studied the short-term (6 month) effects of grazing and grazing exclusion on plant community composition (i.e.,  
31 plant species presented) and litter quality, and long-term (27 – 33 month) effects on soil chemical characteristics  
32 and mixed litter decomposition and N release on the QTP. Our results demonstrate that: (1) shorter term grazing  
33 exclusion had no effect on plant community composition but increased plant palatability and total litter biomass;  
34 (2) grazing resulted in higher N and C content in litter; and (3) grazing accelerated litter decomposition, while  
35 grazing exclusion promoted N release from litter and increased soil organic carbon. In addition, incubation site  
36 had significantly more impact than did litter quality on litter decomposition and N release, while litter quality  
37 affected decomposition in the early stages. This study provides insights into the mechanisms behind the nutrient  
38 cycling in alpine ecosystems. We suggest that periodic grazing and grazing exclusion is beneficial in grassland  
39 management on the QTP.

40

41

42

43

44

45

## 46 1 Introduction

47 The Qinghai-Tibetan Plateau (QTP) represents an important eco-region in China (Wen et al., 2010), in which  
48 alpine grasslands cover more than 85 % of total area and are regarded as the major land unit of natural pastures in  
49 China (Dong et al., 2010). However, the grassland systems in this region have suffered from severe degradation  
50 driven by a range of factors including climate change, overgrazing, over-cultivation and poor management (Han  
51 et al., 2008; Li et al., 2009; Wu et al., 2009; Feng et al., 2010; Wu et al., 2010), and with the degraded land area  
52 increasing at 1.2-7.44 % per year (Ma et al., 2007). Since the 1990's, the restoration of degraded grasslands has  
53 attracted considerable attention (Kang et al., 2007; Han et al., 2008), and some efforts has recently been directed  
54 towards grassland restoration and maintenance by increasing aboveground plant abundance (Niu et al., 2009) and  
55 biodiversity (Wu et al., 2009; Niu et al., 2010), and improving soil organic matter content and nutrient availability  
56 (Cao et al., 2004; Wu et al., 2010; Sun et al., 2011). It is well known that grazing may change the vegetation  
57 community structure, soil structure and nutrient cycling processes, and that such changes have important  
58 consequential impacts on the structure and functioning of the ecosystem as a whole. However, litter decomposition  
59 and N release, the key factors regulating the nutrient cycle and availability at the soil-plant interface through  
60 grazing (Carrera and Bertiller, 2013), are as yet litter studies in these alpine ecosystems (Luo et al., 2010; Zhu et  
61 al., 2016).

62 Herbivore grazing may induce short-term ecophysiological changes in plant tissues which in turn may  
63 translate into litter quality changes, and long-term shifts in plant community composition. At the short-term  
64 ecophysiological level, grazing may promote the plant species producing high-quality litter (Holland and Detling,  
65 1990; Sirotnak and Huntly, 2000; Olofsson and Oksanen, 2002; Semmartin et al., 2004, 2008); because the  
66 consuming of plant tissues by herbivores may favour the grazed species with a higher re-growth rate and greater  
67 nutrient contents in plant tissues due to the higher nutrient uptake (see Holland and Detling, 1990; Olofsson and

68 Oksanen, 2002; Semmartin et al., 2008). At the long-term community level, selective foliar grazing may alter the  
69 competitive interactions and recruitment patterns of plant species, which **may** change their abundance and life  
70 form structure (Bardgett and Wardle, 2003; Semmartin et al., 2008; Wu et al., 2009; Niu et al., 2010). For instance,  
71 herbivores **preferentially feed on** the most palatable plants (e.g., species with high nutrient and low fibre contents),  
72 which **may promote dominance of unpalatable species** (Garibaldi et al., 2007), resulting in the high inputs of low-  
73 quality litter to soil and thus a reduction of decomposition rate, nutrient availability and nutrient cycling (Ritchie  
74 and Knops, 1998; Moretto et al., 2001; Olofsson and Oksanen, 2002). **Therefore, litter in grassland subject to**  
75 **long-term grazing may decompose more slowly. However, some studies demonstrate that grazing *per se* may**  
76 **accelerate litter decomposition by modifying site conditions for litter turnover through physical changes in the**  
77 **soil by herbivore activities, such as trampling and urine/dung deposition (Takar et al., 1990; Fahnestock and**  
78 **Knapp, 1994; Semmartin et al., 2008; Luo et al., 2010; Liang et al., 2018). Empirical evidence of variance** in litter  
79 quality input and **decomposition** caused by grazing is **still subject to debate** (Garibaldi et al., 2007).

80 **It is often assumed** that higher nutrient content in plant tissue usually results in faster litter decomposition,  
81 and **in higher** nutrient mineralization and availability in soil (Olofsson and Oksanen, 2002). At the ecosystem scale,  
82 the chemical characteristics of plant litter, for example the carbon:nitrogen ratios (C:N) and/or nitrogen and lignin  
83 content, are often regarded as the indicators of litter quality (Aerts, 1997; Strickland et al., 2009). Many studies  
84 have demonstrated a positive correlation between litter decomposition rate and **litter** N content, or a negative  
85 relationship between litter decomposition rate and initial **litter** lignin content and C:N or lignin:N ratios ratios (e.g.,  
86 Wardle et al., 2002; Aerts et al., 2003; Semmartin et al., 2004; Garibaldi et al., 2007; Luo et al., 2010; Vaieretti et  
87 al., 2013).

88 **In addition to** litter quality (its chemical composition), **two further factors controlling litter decomposition**  
89 **are** the climate (mainly temperature and humidity) and decomposing organisms (their abundance and activity)

90 (Coûteaux et al., 1995; Aerts, 1997; Semmartin et al., 2004; Keeler et al., 2009; Berg and McClaugherty, 2014;  
91 Zhu et al., 2016). Climate usually regulates decomposition processes at global and regional scales (Coûteaux et  
92 al., 1995; Silver and Miya, 2001), but microbial activity regulates decomposition processes through soil  
93 temperature and moisture effects (modified by grazing) at a local scale (Coûteaux et al., 1995; De Santo et al.,  
94 1993; Luo et al., 2010; Orsborne and Macauley, 1988). Generally, climatic influence dominates litter quality and  
95 decomposer activity in areas where weather conditions are unfavourable (Coûteaux et al., 1995), due to the  
96 dependence of decomposer activity on microclimate (De Santo et al., 1993). Under favourable conditions, litter  
97 quality may largely prevail as the regulator and remain important until the late decomposition stages (Coûteaux  
98 et al., 1995). However, specific temperature and moisture conditions and litter quality may interact strongly and  
99 thus the rate of litter decomposition is difficult to predict.

100 Most studies evaluating the effect of grazing on litter decomposition usually focus on forest, grassland or  
101 crop ecosystems in temperate areas (e.g., Aber and Melillo, 1980; Berg and Staaf, 1981; Luo et al., 2010; McCurdy  
102 et al., 2013), largely ignoring those in the alpine zones. On the QTP, previous studies prove that long-term grazing  
103 exclusion (> 2 years) may promote plant abundance and biodiversity (Niu et al., 2009, 2010; Wu et al., 2009,  
104 2010); however, exclusion may limit the efficient use of grassland. By contrast, the short-term effect of grazing  
105 exclusion is seldom studied. Other previous studies have focused on the dominant species only (e.g., Wu et al.,  
106 2009; Luo et al., 2010) and this approach provides less insight into the nature of nutrient cycling in the grasslands  
107 than work on mixed litter (Zhu et al., 2016; this study). Moreover, few studies have simultaneously investigated  
108 how both litter quality and incubation site affect litter decomposition (e.g., Luo et al. 2010; Zhu et al. 2016; Liang  
109 et al. 2018). In this study, we examined the short-term effect (6 month) of grazing and grazing exclusion on plant  
110 community composition and litter quality and their longer-term effect on mixed litter decomposition and N release  
111 (27 month) and soil chemical characteristics (33 month). Based on the above, this research aimed to test three

112 hypotheses: (1) short-term grazing exclusion does not change plant community composition and litter quality (i.e.,  
113 nutrient content as N and biomass of palatable plant species), (2) grazing may accelerate litter decomposition and  
114 N release and thus increase soil organic carbon and N, and (3) litter quality has less effect on litter decomposition  
115 and N release compared to incubation site. Results of the present study may improve our understanding of nutrient  
116 cycling in alpine regions in general, and this study may also further provide knowledge relevant to the  
117 development of strategies for restoring the degraded grasslands on the QTP in particular.

118

## 119 2 Materials and methods

### 120 2.1 Experimental site

121 This study site was an alpine meadow on the eastern QTP, Northwestern, SW China (N33°59', E102°00', altitude  
122 3,500 m above sea level). The mean annual temperature is 1.2 °C, ranging from -10 °C in January to 11.7 °C in  
123 July, with approximately 270 days with frost per year. The mean annual precipitation over the last 35 years,  
124 occurring mainly during the short and cool summer is 620 mm (Niu et al., 2010). The years during this study (i.e.,  
125 2009 – 2012) were climatically typical (Sun et al., 2015; Supplemental Fig. 1).

126 The grassland selected for experiments was > 9 ha in area (including 6 ha of experimental plots and 3 ha  
127 buffer areas) and regularly used for Tibetan sheep and yak grazing during the grazing season (May – October).  
128 The slopes at the site are less than 5 %, typical of the gently undulating topography of the region. The soil  
129 properties in the experimental plots were similar after a long-term grazing history with the same grazing pattern.

130 The soil type at the experiment site is an alpine meadow soil, similar to the Mat-Cryic Cambisols (Wu et al., 2010).

131

### 132 2.2 Litter composition and quality

133 To measure the annual litter composition and determine whether plants could recover without grazing, three

134 grazing (GP, 100 m × 200 m) and three grazing exclusion paddocks (GEP, 30 m × 20 m) were established when  
135 all aboveground plants were dormant in October 2009. Grazing in GP started with an optimal moderate stocking  
136 rate of 4 Tibetan sheep/ha from April 2010. The mean body weight of sheep was about 38 kg when used for the  
137 experiment. Before grazing started, 20 quadrats (0.5 m × 0.5 m) identified by GPS coordinates were randomly  
138 established within the GP or GEP, and litter was cleared soon after the establishment of quadrats. In October 2010,  
139 we collected all plant litter from each quadrat of the GP and GEP for two purposes: (1) measurement of litter  
140 composition and quality in this experiment, and (2) measurement of litter decomposition and N release in the next  
141 experiment. Three sampling methods [i.e., half alongside, half along diagonal, and two sub-quarters (0.25 m ×  
142 0.25 m) along diagonal; see Supplemental Fig. 2] were designed to minimize the sample variance caused by the  
143 uneven litter distribution and to ensure the similar composition and quality of litter used for this and the next  
144 experiment.

145 To measure the litter composition, litter of different species collected from each quarter was identified.  
146 After litter species identification, litter was separated into two groups of contrasting palatability to the Tibetan  
147 sheep (Niu et al., 2009, 2010; Wu et al., 2009; see Supplementary Table 1): (1) palatable species - preferred and  
148 desirable species, and (2) unpalatable species - undesirable and toxic species. To measure the dry biomass, the  
149 palatable and unpalatable litter was separately oven-dried at 60 °C for 48 h and then weighed.

150 To measure the quality of litter collected from GP (GP-litter treatment) or from GEP (GEP-litter treatment),  
151 the palatable and unpalatable litter from a quarter was mixed again, then ground and stored in a zip-lock bag with  
152 10 g per bag for a quality test. There were six replicates for each treatment. The contents of lignin, cellulose and  
153 hemicellulose were measured as described by van Soest et al. (1991). Organic carbon concentration (C) was  
154 measured by the K<sub>2</sub>Cr<sub>2</sub>O<sub>7</sub>-H<sub>2</sub>SO<sub>4</sub> oxidation method of Walkley-Black (Nelson and Sommers, 1996). The total  
155 Kjeldahl nitrogen (N) and total phosphorus (P) were analyzed using a FIAstar 5000 flow injection analyzer (Foss

156 Tecator, Högnäs, Sweden) (Chen et al., 2016). We also calculated the ratios of C:N, lignin:N, cellulose:N and  
157 hemicellulose:N.

158 We also examined the effects of grazing and grazing exclusion on soil characteristics. We randomly  
159 collected five soil samples in each experimental paddock (n=30 in total) from the 0 – 10 cm depth using a bucket  
160 auger (10 cm in diameter) in October of 2010, 2011 and 2012. The same methods used to test litter quality (i.e.,  
161 Nelson and Sommers, 1996; Chen et al., 2016) were applied to estimate the soil organic carbon (SOC), total  
162 nitrogen (TN) and total phosphorus (TP).

163

### 164 2.3 Litter decomposition and N release

165 In this experiment, we included four treatments: (1) GP-GP, litter of all species was collected from and incubated  
166 in the GP; (2) GEP-GEP, litter of all species was collected from and incubated in the GEP; (3) GP-GEP, litter of  
167 all species was collected from the GP but incubated in the GEP; (4) GEP-GP, litter of all species was collected  
168 from the GEP but incubated in the GP. Treatments 1 and 2 were designated “in situ” incubation treatments, while  
169 treatments 3 and 4 were designated “across” grazing category incubation treatments, and these were included to  
170 improve understanding of the “home-field advantage” effect on litter deposition (John et al., 2011).

171 For each sample soil particles attached to the litter were cleaned off with a soft brush, and samples were air-  
172 dried for three days. Dry litter collected from each quadrat was cut to  $\approx$  5 cm length and 10 g litter was packed  
173 into a nylon litter-bag (15 cm  $\times$  20 cm with mesh size of 0.35 mm) (Cornelissen, 1996), which should have  
174 prevented any loss of material and had no effect on litter decomposition (Cornelissen et al., 1999). On 20<sup>th</sup> Oct  
175 2010, the packed litter was incubated above the soil surface by fastening to the ground surface with four steel  
176 stakes to prevent removal by sheep and small animals (Vaieretti et al., 2013), such as the plateau pika *Ochotona*  
177 *curzoniae* (Hodgson). For each treatment, 24 litter-bags were incubated with 20 cm apart from each other to reduce

178 the mutual interference. Three litter bags from each treatment were retrieved after incubation periods of 56, 141,  
179 247, 391, 444, 582, 695 or 799 days (i.e., on 15<sup>th</sup> December 2010, 10<sup>th</sup> March, 24<sup>th</sup> June and 4<sup>th</sup> September 2011,  
180 and 7<sup>st</sup> January, 24<sup>th</sup> May, 14<sup>th</sup> September and 27<sup>th</sup> December 2012, respectively). There were a total of 96 litter-  
181 bags used in this experiment. Retrieved litter was brought back to the laboratory, cleaned by removing any  
182 extraneous material attached, and then weighed after being oven-dried at 60 °C for 48 h. Samples were ground  
183 and stored in a zip-lock bag for further chemical analyses as mentioned above. We estimated the litter  
184 decomposition and N release as the percentage of dry weight lost during each incubation period (Cornelissen et  
185 al., 1999; Vaieretti et al., 2013).

186

## 187 2.4 Statistical analyses

188 A goodness-of-fit test (Shapiro-Wilk test, Univariate Procedure) was used to test the normality of data before  
189 mean comparison using analysis of variance (ANOVA, GLM Procedure). All data were normally distributed.  
190 Data on the initial chemical characteristics of litter (Table 1) were analyzed using ANOVA followed by Tukey's  
191 Studentized multiple range test. Data on the biomass of palatable or unpalatable species and that on the total  
192 biomass between GP and GEP were also analyzed using ANOVA, while for GP or GEP the difference in litter  
193 biomass between the palatable and unpalatable species was compared by paired-t test (TTEST Procedure) (Fig.  
194 1). Data on the final proportion of litter biomass or N remaining (Fig. 4), litter quality (content of organic carbon,  
195 nitrogen, phosphorous and other chemical characteristics of litter) (Table 1), and soil SOC, TN and TP (Fig. 2)  
196 were analyzed using ANOVA followed by least significant difference test (LSD test) for multiple comparisons.

197 The decomposition rate ( $k$ ,  $\text{g} \cdot 10 \text{ g}^{-1} \cdot \text{day}^{-1}$ ) of litter biomass during the incubation period (Table 2) was  
198 assessed using a negative exponential model according to Swift et al. (1979):  $y = a \cdot e^{-(t \cdot k)}$ , where  $y$  is the dry  
199 biomass of litter remaining in the litter bags at time  $t$  (days),  $a$  is the initial litter biomass (i.e., 10 g in this study).

200 The difference in **decomposition** rate between treatments was compared according to Julious (2004), i.e. there is  
201 **deemed to be** no significant difference in **decomposition** rate if their 83.4 % CL overlap. The **decomposition** rate  
202 and 83.4 % CI were estimated by fitting the negative exponential model to a nonlinear least square regression  
203 model (NLIN Procedure).

204 **A multivariate regression model (GLM Procedure) employed by Vaieretti et al. (2013) was applied to**  
205 **quantify the effect of incubation site and litter quality (the two independent factors) on the final litter**  
206 **decomposition or N release (the dependent factor) (Table 3): litter decomposition or N release = Site + Quality +**  
207 **Site×Quality +  $\epsilon$ , where 'Site' is the paddock category where the litter was incubated (i.e., incubation site: GP and**  
208 **GEP), 'Quality' is the litter quality reflecting the sources where the litter was collected from (i.e., GP and GEP),**  
209 **and  $\epsilon$  is the model error.** The **proportional contribution of incubation site, litter quality** and their interaction to  
210 variability of litter decomposition or N release was calculated **as the sum of squares for each of the terms,** divided  
211 by the total sum of squares. The Type I sum of squares was used because of the balanced design of this experiment.  
212 All analyses were done using SAS 9.3 (SAS Institute Inc., Cary, NC, USA). **The rejection level for  $H_0$  was set at**  
213  **$\alpha < 0.05$ .** **Values of the means ( $\pm$  SE) are presented in Figs. 1-4.**

214

### 215 **3 Results**

#### 216 **3.1 Litter composition and quality and soil property**

217 Fifty-five plant species (mostly forbs and **grasses along** with several legumes and sedges) were identified, and **all**  
218 **were found** in both GP and GEP, except *Gentiana macrophylla* Pallas, which was only found in the GP  
219 (Supplemental Table 1). However, even though the **annual litter biomass** of unpalatable species in both GP and  
220 GEP was similar (ANOVA:  $F_{1,38} = 3.43$ ,  $P = 0.0717$ ), litter **biomass** of palatable species was significantly greater  
221 in the GEP than in the GP (ANOVA:  $F_{1,38} = 75.32$ ,  $P < 0.0001$ ), **and this difference contributed** significantly more

222 to the total litter **biomass** in the GEP than in the GP (ANOVA:  $F_{1,38} = 114.66$ ,  $P < 0.0001$ ) (Fig. 1). The litter  
223 **biomass** was not significantly different between palatable and unpalatable species in the GP (Paired-t test:  $t_{19} =$   
224  $0.96$ ,  $P = 0.3510$ ); however, in the GEP, litter **biomass** of palatable species was significantly greater than that of  
225 unpalatable species (Paired-t test:  $t_{19} = 7.17$ ,  $P < 0.0001$ ) (Fig. 1).

226 **GP-litter had significantly higher C and N but significantly lower hemicellulose and hemicellulose:N than**  
227 **GEP-litter (Table 1). Although other quality characteristics were lower in GP-litter than in GEP-litter, the**  
228 **differences were not significant (Table 1).**

229 The concentrations of soil TN and TP were not significantly different between **the** GP and GE for **any** year  
230 (LSD = 0.0002 - 0.0015 and 0.0003 - 0.0004 for TN and TP, respectively;  $P > 0.05$ ) (Fig. 2a-b). Similarly, there  
231 was no **significant** difference in SOC concentration between the GP and GE in 2010 and 2011 (LSD = 0.0169 and  
232 0.0111 for 2010 and 2011, respectively;  $P > 0.05$ ), while in 2012 SOC was significantly higher in GEP than in  
233 GP (LSD = 0.0138,  $P = 0.0279$ ) (Fig. 2c).

234

### 235 **3.2 Litter decomposition**

236 The proportion of litter **biomass** remaining **continuously** decreased with incubation duration **and litter decomposed**  
237 **faster in the first year (i.e., 44.6, 38.5, 41.46 and 31.6 % decomposition in GP-GP, GEP-GEP, GEP-GP and GP-**  
238 **GEP, respectively) than in the second year (i.e., 18.8, 24.1, 27.6 and 23.4 % decomposition in GP-GP, GEP-GEP,**  
239 **GEP-GP and GP-GEP, respectively) (Fig. 3a).** As shown in Table 2, the decomposition rate ( $k$ ) of litter incubated  
240 in GP was significantly higher than that in GEP (non-overlap of 83.4 % CL), i.e., for the “in situ” treatments  $k$  in  
241 GP-GP  $> k$  in GEP-GEP and for the “across” treatments  $k$  in GEP-GP  $> k$  GP-GEP. The final proportion of litter  
242 **biomass** remaining was significantly lower in GP-GP and GEP-GP than in GP-GEP (LSD = 2.51,  $P < 0.0001$ )  
243 **(Fig. 4a).**

244

### 245 3.3 N release

246 Generally, the percentage of total N release did not change during the first winter when temperature was  $< 0$  °C,  
247 except that it increased during the incubation period of December 2010 and March 2011 (first winter) in the  
248 treatment GEP-GP (Fig. 3b). From January in the second winter (2012), the percentage of total N remaining  
249 decreased steadily until the end of the experiment (Fig. 3b). The final proportion of total N remaining was  
250 significantly higher in GEP-GP and significantly lower in GEP-GEP and GP-GEP (LSD test: LSD = 5.36, P =  
251 0.0002) (Fig. 4b).

252

### 253 3.4 Contribution of incubation site and litter quality to litter decomposition and N release

254 The multivariate regression model indicates that both incubation site and litter quality significantly affected litter  
255 decomposition and N release (Table 3). Incubation site contributed respectively near 25 % and 50 % more to litter  
256 decomposition and N release than did litter quality (Table 3). Furthermore, the model predicts that GP resulted in  
257 significantly greater litter decomposition (8.13 %) but significantly lower N release (9.73 %) than did GEP ( $F_{1,8}$   
258 = 62.48 and 57.49 for litter decomposition and N release, respectively;  $P < 0.0001$ ). Results show that GEP-litter  
259 decomposed significantly faster (2.5 %) but released N significantly more slowly (9.27 %) than GP-litter ( $F_{1,8}$  =  
260 34.99 and 15.80 for litter decomposition and N release, respectively;  $P < 0.01$ ).

261 A significant interaction between incubation site and litter quality for litter decomposition was found ( $F_{2,8}$  =  
262 7.10,  $P = 0.0286$ ), i.e., litter collected from GEP but incubated in GP decomposed significantly faster (also see  
263 Fig. 4a). However, the interaction between incubation site and litter quality on N release was not significant ( $F_{2,8}$   
264 = 2.76,  $P = 0.1350$ ).

265

---

## 266 4 Discussion

### 267 4.1 Litter Composition and Quality

268 Grazing or grazing exclusion of herbivores may indirectly alter the species composition and functioning of  
269 grasslands by inducing shifts in plant competitive interactions and recruitment patterns, and thus changes in  
270 species abundance and life form structure (Bardgett and Wardle, 2003; Garibaldi et al., 2007; Semmartin et al.,  
271 2008; Wu et al., 2009; Niu et al., 2010; Chaneton, 2011). However, our results indicate that herbivore grazing or  
272 grazing exclusion did not alter plant community composition in terms of species inventory, as species found in  
273 the GEP mostly also occurred in the GP. On the QTP, species composition is grazing-intensity-dependent (Niu et  
274 al. 2010; Sun et al., 2011) and/or grazing exclusion-period-dependant (Wu et al., 2009). Thus our results imply  
275 that a stocking rate of 4 Tibetan sheep/ha in the GP or a short period of grazing exclusion (i.e., from April to  
276 October) in the GEP did not change the species composition.

277 However, our results show that herbivore grazing significantly altered species composition in terms of  
278 species abundance or palatability with significantly less palatable as well as total litter produced in the GP  
279 compared to the GEP (Fig. 1). The low biomass of palatable species in GP may be attributed to the more palatable  
280 species (mostly the grasses and sedges, see Supplemental Table 1) on the QTP being taller (Sun et al., 2011), and  
281 therefore more accessible to herbivore grazing, in addition to being more likely to be grazed by preferential  
282 grazing. Through these two mechanisms, the biomass of palatable species in the GP would subsequently be  
283 reduced. Results of this study indicate that grazing exclusion for a short period may allow the recovery of palatable  
284 species in the alpine meadows. However, there was no significant difference in the litter biomass of unpalatable  
285 species between the GP and GEP (Fig. 1), which provides evidence against the assumption that removing the  
286 canopy of palatable species may allow the intra- and inter-specific competition for light which ultimately favours

287 the establishment of short, less-palatable species (Sternberg et al., 2000; Pavlů et al., 2008; Wu et al., 2009; Sun  
288 et al., 2011).

289 It is **generally accepted** that litter quality is usually determined by **the levels of various** chemical compounds  
290 such as soluble C, N and P, as well as lignin or lignin:N ratio, and litter of high quality usually has higher N  
291 content but lower lignin and lignin:N ratio (e.g., Aerts, 1997; Olofsson and Oksanen, 2002; Wardle et al., 2002;  
292 Garibaldi et al., 2007; Strickland et al., 2009). In this study, grazing might have improved litter quality at least to  
293 **some extent** by significantly increasing the N content and potentially **reducing** the hemicellulose content and C:N,  
294 lignin:N, cellulose:N and hemicellulose:N ratios (Table 1). Therefore, our results **align with** previous studies that  
295 **have indicated** grazing may promote litter quality **due to the high nutrient uptake** (e.g., Sirotiak and Huntly, 2000;  
296 Olofsson and Oksanen, 2002; Semmartin et al., 2004).

297

#### 298 **4.2 Litter decomposition**

299 For a given **climatic** region, the ecological processes of litter decomposition are regulated by incubation  
300 microenvironment (i.e., grazing/grazing exclusion and soil property in this study) and litter quality. Our results  
301 **suggest** that herbivore grazing played a major role in litter decomposition on the **QTP**. Firstly many studies have  
302 demonstrated that litter quality is one of the most important factors affecting the litter decomposition, and litter  
303 with higher N content but lower lignin and lignin:N ratio will decompose faster (Aerts, 1997; Olofsson and  
304 Oksanen, 2002; Wardle et al., 2002; Garibaldi et al., 2007; Strickland et al., 2009). **Therefore, it may be expected**  
305 **that regardless of incubation site, GP-litter that had significantly higher N content should decompose faster than**  
306 **GEP-litter. However, evidence for this expectation was only detected for the “in situ” incubation treatments (i.e.,**  
307 **greater decomposition rate in GP-GP than in GEP-GEP), while for the “across” incubation treatments opposite**  
308 **results were found (i.e., greater decomposition rate in GEP-GP than in GP-GEP) (Table 2 and Fig. 4a). Our**  
309 **experimental site is located at high altitude with a low mean annual temperature of 1.2 °C; hence the activity of**

310 decomposers may be inhibited during the cold seasons (Coûteaux et al., 1995). Therefore, litter quality may not  
311 be a good predictor of litter decomposability in cold temperate regions (Aerts, 1997), where climate is more  
312 important than litter quality in the regulation of litter decomposition (Coûteaux et al., 1995). On the QTP,  
313 decomposition rate ( $k = 1.04 \times 10^{-3} - 1.34 \times 10^{-3} \text{ g} \cdot 10 \text{ g}^{-1} \cdot \text{day}^{-1}$  in Table 2, i.e.  $k = 0.38 - 0.48 \text{ g} \cdot \text{g}^{-1} \cdot \text{year}^{-1}$ ) was  
314 much lower than that of the global mean ( $k \approx 0.75 \text{ g} \cdot \text{g}^{-1} \cdot \text{year}^{-1}$ ) with similar latitudes ( $N30^\circ - 40^\circ$ ) (Zhang et al.,  
315 2008).

316 Additionally, incubation site had significantly greater effect on litter decomposition ( $\approx 25\%$ ) than did litter  
317 quality (Table 3), and regardless of litter quality, litter decomposed faster in GP (19.9 % for GP-litter and 11.8 %  
318 for GEP-litter) than in GEP (Fig. 4a; Table 2). This may be attributed to the effect of herbivore grazing activity,  
319 which modifies the incubation site conditions for litter turnover (Takar et al., 1990; Fahnestock and Knapp, 1994;  
320 Semmartin et al., 2008; Luo et al., 2010; Liang et al., 2018). Our results further demonstrate that regardless of  
321 incubation site and litter quality, litter decomposed faster in the first year (31.6 – 44.6 % decomposition) than in  
322 the second year (18.8 – 27.6 % decomposition) (Fig. 3a). Berg (2014) and Berg and McLaugherty (2014) have  
323 stated that litter decomposition rate varies at different stages. In the early stages of decomposition litter mass is  
324 lost rapidly via the leaching of soluble compounds, while in the later stages decomposition can even cease after  
325 only recalcitrant litter compounds remain (Berg 2014; Berg and McLaugherty 2014). Therefore, litter quality  
326 regulates decomposition processes mainly in the early stages of decomposition (Berg and McLaugherty, 2014),  
327 which is supported by our results, i.e., when incubated in GP in the first year, the percentage decomposition of  
328 GP-litter (44.6 %) was higher than that of GEP-litter (41.5 %). However, we could not reject the above conclusion  
329 that incubation site is the dominant factor affecting litter decomposition over litter quality, as in the first year litter  
330 always decomposed faster in GP (i.e., 44.6 % in GP-GP and 41.5 % in GEP-GP) than in GEP (i.e., 38.5 % in  
331 GEP-GEP and 31.6 % in GP-GEP) (Fig. 3a). These data also imply that a home-field advantage is detected only

332 for GP-litter during the first year of incubation (i.e., percentage decomposition 44.6 % in GP-GP > 31.6 % in GP-  
333 GEP) with no evidence for GEP-litter (i.e., percentage decomposition 38.5 % in GEP-GEP < 41.5 % in GEP-GP).

334 In a long-term (9 year) study on the QTP, Wu et al. (2009) reported that grazing exclusion favors the  
335 increase of soil total nitrogen, soil organic matter, soil organic carbon, soil microbial biomass carbon and soil  
336 carbon storage. It is interesting that in the present study, only soil organic carbon (SOC) significantly increased  
337 after three-years grazing exclusion (Fig. 2). The increase in SOC in GEP may be because grazing exclusion  
338 prevents the reduction of removal of palatable litter by the herbivores (Fig. 1), and the organic C locked within  
339 plant tissues may be returned to the soil during litter decomposition instead (Bardgett and Wardle, 2003; Wu et  
340 al., 2009). Holland and Detling (1990) and Ågren et al. (1999) stated that increasing carbon availability in soil  
341 may promote decomposer growth and activity even at low nitrogen concentrations. However, the expected results,  
342 i.e. significantly higher litter decomposition rate caused by the possible increasing decomposer mass and/or  
343 activity in the grazing exclusion grasslands (Wu et al., 2009), were not observed in the GEP in this study (Table  
344 2, Fig. 4a). Thus during a relatively short period the soil properties are unlikely to be significantly changed through  
345 grazing or grazing exclusion, and thus limited duration grazing events have a smaller effect on litter decomposition  
346 under cool environments on the QTP, than in experiments conducted in warmer climates.

#### 348 4.3 N release

349 N release is a more complex process, compared to litter decomposition. N release may involve any one or both  
350 processes of N immobilization and N mineralization, where the former results in the accumulation of N in the  
351 litter and the latter causes the release of N from the litter (Manzoni et al., 2008). Swift et al. (1979) and Berg and  
352 McClaugherty (2014) reported that the biological decomposition of litter is mainly carried out by microbial  
353 decomposers, which *per se* have a higher N:C ratio compared with most litter types. This property of decomposers  
354 creates a high N demand for decomposer growth (Manzoni et al., 2008). Results show that regardless of litter

355 quality or source, N remaining was significantly higher when litter was incubated in GP than in GEP (Fig. 4b).  
356 Bosatta and Balesdent, (1996) and Manzoni et al. (2008), a promising candidate mechanism may be that the faster  
357 decomposition rate of litter in GP increases the utilization of C by the decomposers which in turn increases the  
358 N:C ratio in litter; when N:C ratio is high, large amounts of mineral N are immobilized, increasing the N  
359 concentration in litter. This mechanism may also account for the dynamics of N release over the incubation period  
360 (Fig. 3b). For instance, decomposer activity resulted in continuous C consumption and litter decomposition  
361 (March – June 2011), while high N:C ratio due to decomposition progress induced the release of accumulated N  
362 (June – August 2011). The inverse pattern of N release and litter decomposition found in this study (Fig. 4) is  
363 frequently reported (e.g., Aber and Melillo, 1980; Fahey et al., 1991; Gallardo and Merino, 1992).

364 It is not surprising that because both litter decomposition and N release are regulated by decomposers  
365 synchronously, incubation site also had a significantly greater effect ( $\approx 50\%$ ) on N release as on litter  
366 decomposition (Table 3) than did litter quality, indicating the latter is not a good predictor on litter N release in  
367 the cold temperate region (Aerts, 1997).

368

## 369 5 Conclusion

370 Results of our study are not completely consistent with previously proposed hypotheses. On the cold QTP, short-  
371 term grazing exclusion did not promote species abundance but increases plant palatability and total litter biomass.  
372 Grazing improves litter quality through higher N content but lower hemicellulose and hemicellulose:N ratio.  
373 Grazing significantly accelerated litter decomposition, while grazing exclusion promoted N release and increased  
374 SOC. Although litter quality may affect decomposition at the early stages, incubation site had significantly more  
375 impact on both litter decomposition and N release. The different effects of grazing and grazing exclusion  
376 functioning on the grassland ecosystems may have implications in the management of alpine meadows on the

377 QTP. For example, periodic grazing and grazing exclusion may be a good option which allows plant recovery and  
378 promotes nutrient cycling, and thus contributes to the restoration of degraded grasslands.

379

380 *Author contributions.* YS and FH designed the experiments, YS, ZW and SH Chang performed research and  
381 collected data. XZH and YS analysed data and prepared the manuscript, and all authors contributed to the writing.

382

383 *Competing interests.* The authors declare that they have no conflict of interest.

384

385 *Acknowledgments.* We are very grateful to Dr. J.-A. Subke (Editor) and two anonymous reviewers for their  
386 constructive comments and suggestions, which have significantly improved the paper. We are also grateful to

387 Professor C. Matthew for his valuable comments and time spent in English editing of the manuscript. This study

388 was financially supported by the National Key Project of Scientific and Technical Supporting Programs

389 (2014CB138706), National Natural Science Foundation of China (No. 31672472), Program for Changjiang

390 Scholars and Innovative Research Team in University (IRT13019) and the independent grants from the State Key

391 Laboratory of Grassland Agro-ecosystems (SKLGAE201708).

392

### 393 **References**

394 Aber, J. D. and Melillo, J. M.: Litter decomposition: measuring relative contributions of organic matter and

395 nitrogen to forest soils, *Can. J. Biochem.*, 58, 416-421, doi:10.1139/b80-046, 1980.

396 Aerts, R., De Caluwe, H. and Beltman, B.: Plant community mediated vs. nutritional controls on litter

397 decomposition rates in grasslands, *Ecology*, 84, 3198-3208, doi:10.1890/02-0712, 2003.

398 Aerts, R.: Climate, leaf litter chemistry and leaf litter decomposition in terrestrial ecosystems: a triangular

399 relationship, *Oikos*, 79, 439-449, doi:10.2307/3546886, 1997.

- 400 Ågren, G. I., Shaver, G. R. and Rastetter, E. B.: Nutrients: dynamics and limitations, in: Luo, Y., Mooney, H. A.  
401 (Eds.): Carbon dioxide and environmental stress, Academic Press, San Diego, 333-345 pp., 1999.
- 402 Bardgett, R. D. and Wardle, D. A.: Herbivore-mediated linkages between aboveground and belowground  
403 communities, *Ecology*, 84, 2258-2268, doi:10.1890/02-0274, 2003.
- 404 Berg, B.: Decomposition patterns for foliar litter – A theory for influencing factors. *Soil Biol. Biochem.*, 78, 222-  
405 232, doi:org/10.1016/j.soilbio.2014.08.005, 2014.
- 406 Berg, B. and McClaugherty, C.: Plant litter: decomposition, humus formation, carbon sequestration, 3rd ed.,  
407 Springer, 315 p., 2014.
- 408 Berg, B. and Staff, H.: Leaching, accumulation and release of nitrogen in decomposing forest litter, in: Terrestrial  
409 Nitrogen Cycles, Clark, F. E. and Rosswall, T. (Eds.): Processes, Ecosystem Strategies and Management  
410 Impacts, *Ecological Bulletins*, Stockholm, Sweden, 33, 163-178 pp., 1981.
- 411 Bosatta, E. and Balesdent, J.: Isotope discrimination during decomposition of organic matter: a theoretical analysis,  
412 *Soil Sci. Soc. Am. J.*, 60, 1121-1126, doi:10.2136/sssaj1996.03615995006000040023x, 1996.
- 413 Cao, G. M., Tang, Y. H., Mo, W. H., Wang, Y. S., Li, Y. N. and Zhao, X. Q.: Grazing intensity alters soil  
414 respiration in an alpine meadow on the Tibetan plateau, *Soil Biol. Biochem.*, 36, 237-243, doi:10.1016/j.  
415 soilbio.2003.09.010, 2004.
- 416 Carrera, A. L. and Bertiller, M. B.: Combined effects of leaf litter and soil microsite on decomposition process in  
417 arid rangelands, *J. Environ. Manage.*, 114, 505-511, doi:10.1016/j.jenvman.2012.10.059, 2013.
- 418 Chaneton, E. J.: Linking grazing-induced changes in plant biodiversity to rangeland ecosystem function, IX  
419 International Rangeland Congress, Lugar, Rosario, Año, 286-291 pp., 2011.
- 420 Chen, X. J., Hou, F. J., Matthew, C. and He, X. Z.: Soil C, N, and P stocks evaluation under major land uses on  
421 China's Loess Plateau, *Rangeland Ecol. Manage.*, 70, 341-347, doi:10.1016/j.rama.2016.10.005, 2016.

- 
- 422 Cornelissen, J. H. C., Harguindeguy, N. P., Díaz, S., Grime, J. P., Marzano, B., Cabido, M., Vendramini, F. and  
423 Cerabolini, B.: Leaf structure and defence control litter decomposition rate across species and life forms in  
424 regional floras on two continents, *New Phytol.*, 143, 191-200, doi:10.1046/j.1469-8137.1999.00430.x, 1999.
- 425 Cornelissen, J. H. C.: An experimental comparison of leaf decomposition rates in a wide range of temperate plant  
426 species and types, *J. Ecol.*, 84, 573-582, doi:10.2307/2261479, 1996.
- 427 Coûteaux, M. M., Bottner, P. and Berg. B.: Litter decomposition, climate and litter quality, *Trends Ecol. Evol.*,  
428 10, 63-66, 10.1016/S0169-5347(00)88978-8, 1995.
- 429 De Santo, A. V., Berg, B., Rutigliano, F. A., Alfani, A. and Floretto, A.: Factors regulating early-stage  
430 decomposition of needle litters in five different coniferous forests, *Soil Biol. Biochem.*, 25, 1423-1433,  
431 doi:10.1016/0038-0717(93)90057-I, 1993.
- 432 Dong, S. K., Wen, L. U., Zhu, L. and Li, X. Y.: Implication of coupled natural and human systems in sustainable  
433 rangeland ecosystem management in HKH region, *Front. Earth Sci. China*, 4, 42-50, doi:10.1007/s11707-  
434 010-0010-z, 2010.
- 435 Fahey, T. J., Stevens, P. A., Hornung, M. and Rowland, P.: Decomposition and nutrient release from logging  
436 residue following conventional harvest of Sitka spruce in North Wales, *Forestry*, 64, 289-301,  
437 doi:10.1093/forestry/ 64.3.289, 1991.
- 438 Fahnestock, J. T. and Knapp, A. K.: Plant responses to selective grazing by bison: interactions between light,  
439 herbivory and water stress, *Vegetatio*, 115,123-131, doi:10.1007/BF00044867, 1994.
- 440 Feng, R. Z., Long, R. J., Shang, Z. H., Ma, Y. S., Dong, S. K., Wang, Y. L.: Establishment of *Elymus natans*  
441 improves soil quality of a heavily degraded alpine meadow in Qinghai-Tibetan Plateau, China, *Plant Soil*,  
442 327, 403-411, doi:10.1007/s11104-009-0065-3, 2010.

- 
- 443 Gallardo, A. and Merino, J.: Nitrogen immobilization in leaf litter at two Mediterranean ecosystems of SW Spain,  
444 *Biogeochemistry*, 15, 213-228, doi:10.1007/BF00002937, 1992.
- 445 Garibaldi, L. A., Semmartin, M. and Chaneton, E. J.: Grazing-induced changes in plant composition affect litter  
446 quality and nutrient cycling in flooding Pampa grasslands, *Oecologia*, 151, 650-662, doi:10.1007/s00442-  
447 006-0615-9, 2007.
- 448 Han, J. G., Zhang, Y. J., Wang, C. J., Bai, W. M., Wang, Y. R., Han, G. D., Li, L. H.: Rangeland degradation and  
449 restoration management in China, *Rangeland J.*, 30, 233-239, doi: 10.1071/RJ08009, 2008.
- 450 Holland, E. A. and Detling, J. K.: Plant response to herbivory and belowground nitrogen cycling, *Ecology*, 71,  
451 1040-1049, doi:10.2307/1937372, 1990.
- 452 John, M. G. S., Orwin, K. H. and Dickie, I. A.: No 'home' versus 'away' effects of decomposition found in a  
453 grassland-forest reciprocal litter transplant study, *Soil Biol. Biochem.*, 43, 1482-1489, 10.1016/j.soilbio.  
454 2011.03.022, 2011.
- 455 Julious, S. A.: Using confidence intervals around individual means to assess statistical significance between two  
456 means, *Pharm. Stat.*, 3, 217-222, doi:10.1002/pst.126, 2004.
- 457 Kang, L., Han, X. G., Zhang, Z. B. and Sun O. J. X.: Grassland ecosystems in China: review of current knowledge  
458 and research advancement, *Philos. Trans. R. Soc. Lond. B. Biol. Sci.*, 362, 997-1008, doi:10.1098/rstb.  
459 2007.2029, 2007.
- 460 Keeler, B. L., Hobbie, S. E. and Kellogg, L. E.: Effects of long-term nitrogen addition on microbial enzyme  
461 activity in eight forested and grassland sites: implications for litter and soil organic matter decomposition,  
462 *Ecosystems*, 12, 1-15, doi: 10.1007/s10021-008-9199-z, 2009.

- 463 Li, X. G., Zhang, M. L., Li, Z. T., Shi X. M., Ma, Q. and Long, R. J.: Dynamics of soil properties and organic  
464 carbon pool in topsoil of zokor-made mounds at an alpine site of the Qinghai-Tibetan Plateau, *Biol. Fert.*  
465 *Soils*, 45, 865-872, doi:10.1007/s00374-009-0398-3, 2009.
- 466 Liang, D. F., Niu, K. C., Zhang, S. T.: Interacting effects of yak dung deposition and litter quality on litter mass  
467 loss and nitrogen dynamics in Tibetan alpine grassland, *Grass Forage Sci.*, 73, 123-131, 10.1111/gfs.12280,  
468 2018.
- 469 Luo, C. Y., Xu, G. P., Chao, Z. G., Wang, S. P., Lin, X. W., Hu, Y. G., Zhang, Z. H., Duan, J. C., Chang, X. F.,  
470 Su, A. L., Li, Y. N., Zhao, X. Q., Du, M. Y., Tang, Y. H. and Bruce, K.: Effect of warming and grazing on  
471 litter mass loss and temperature sensitivity of litter and dung mass loss on the Tibetan plateau, *Global Change*  
472 *Biology*, 16,1606-1617, doi:10.1111/j.1365-2486.2009.02026.x, 2010.
- 473 Ma, Y. S., Zhang, Z. H., Dong, Q. M., Shi, J. J., Wang, Y. L. and Sheng L.: Application of restoration ecology in  
474 “black soil type” degraded grassland rebuilding, *Journal of Gansu Agricultural University*, 42, 91-97, doi:  
475 10.13432/j.cnki.jgsau.2007.02.021, 2007.
- 476 Manzoni, S., Jackson, R. B., Trofymow, J. A. and Porporato, A.: The global stoichiometry of litter nitrogen  
477 mineralization, *Science*, 321, 684, doi:10.1126/science.1159792, 2008.
- 478 Moretto, A. S., Distel, R. A. and Didoné, N. G.: Decomposition and nutrient dynamic of leaf litter and roots from  
479 palatable and unpalatable grasses in a semi-arid grassland, *Appl. Soil Ecol.*, 18, 31-37, doi:10.1016/S0929-  
480 1393(01)00151-2, 2001.
- 481 Nelson, D. and Sommers, L.: Total carbon, organic carbon and organic matter, in: Sparks, D. L., Page, A. L.,  
482 Helmke, P. A., Loeppert, R. H., Soltanpour, P. N., Tabatabai, M. A., Johnston, C. T. and Sumner, M. E.  
483 (Eds.): *Methods of soil analysis. Part 3: chemical methods*, Soil Science Society of America Book Series,  
484 Number 5, Soil Science Society of America, Wisconsin, 961-1010 pp., 1996.

- 
- 485 Niu, K. C., Choler, P., Zhao, B. B. and Du, G. Z.: The allometry of reproductive biomass in response to land use  
486 in Tibetan alpine grasslands, *Funct. Ecol.*, 23, 274-283, doi:10.1111/j.1365-2435.2008.01502.x, 2009.
- 487 Niu, K. C., Zhang, S. T., Zhao, B. B. and Du, G. Z.: Linking grazing response of species abundance to functional  
488 traits in the Tibetan alpine meadow, *Plant Soil*, 330, 215-223, doi:10.1007/s11104-009-0194-8, 2010.
- 489 Olofsson, J. and Oksanen, L.: Role of litter decomposition for the increased primary production in areas heavily  
490 grazed by reindeer: a litterbag experiment, *Oikos*, 96, 507-515, doi:10.1034/j.1600-0706.2002.960312.x,  
491 2002.
- 492 Orsborne, J. L. and Macauley, B. J.: Decomposition of *Eucalyptus* leaf litter: influence of seasonal variation in  
493 temperature and moisture conditions, *Soil Biol. Biochem.*, 20, 369-375, doi:10.1016/0038-0717(88)90018-  
494 1, 1988.
- 495 Pavlů, V., Hejcman, M., Pavlanduring, L. and Gaisler, J.: Restoration of grazing management and its effect on  
496 vegetation in an upland grassland, *Appl. Veg. Sci.*, 10, 375-382, doi: 10.1111/j.1654-109X.2007.tb00436.x,  
497 2008.
- 498 Ritchie, M. E. and Knops, J. M. H.: Herbivore effects on plant and nitrogen dynamics in oak savannah, *Ecology*,  
499 79, 165-177, doi:10.1890/0012-9658(1998)079[0165:HEOPAN]2.0.CO;2, 1998.
- 500 Semmartin, M., Aguiar, M. R., Distel, R. A., Moretto, A. S. and Ghersa, C. M.: Litter quality and nutrient cycling  
501 affected by grazing-induced species replacements along a precipitation gradient, *Oikos*, 107,148-160,  
502 doi:10.1111/j.0030-1299.2004.13153.x, 2004.
- 503 Semmartin, M., Garibaldi, L. A. and Chaneton, E. J.: Grazing history effects on above-and below-ground litter  
504 decomposition and nutrient cycling in two co-occurring grasses, *Plant Soil*, 303, 177-189, doi:10.1007/s  
505 11104-007-9497-9, 2008.

- 
- 506 Sirotnak, J. M. and Huntly, N. J.: Direct and indirect effects of herbivores on nitrogen dynamics: voles in riparian  
507 areas, *Ecology*, 81,78-87, doi:10.1890/0012-9658(2000)081%5B0078:DAIEOH%5D2.0.CO;2, 2000.
- 508 Sternberg, M., Gutman, M., Perevolotsky, A., Ungar, E. D. and Kigel, J.: Vegetation response to grazing  
509 management in a Mediterranean herbaceous community: a functional group approach, *J. Appl. Ecol.*, 37,  
510 224-237, doi:10.1046/j.1365-2664.2000.00491.x, 2000.
- 511 Strickland, M. S., Osburn, E., Lauber, C., Fierer, N. and Bradford, M. A.: Litter quality is in the eye of the beholder:  
512 initial decomposition rates as a function of inoculum characteristics, *Funct. Ecol.*, 23, 627-636, doi:10.1111/j.  
513 1365-2435.2008.01515.x, 2009.
- 514 Sun, D. S., Wesche, K., Chen, D. D., Zhang, S. H., Wu, G. L., Du, G. Z. and Comerford, N. B.: Grazing depresses  
515 soil carbon storage through changing plant biomass and composition in a Tibetan alpine meadow, *Plant Soil*  
516 *Environ.*, 57, 271-278, doi:2-s2.0-79959230740, 2011.
- 517 Sun, Y., Angerer, J. P. and Hou, F. J.: Effects of grazing systems on herbage mass and liveweight gain of Tibetan  
518 sheep in Eastern Qinghai-Tibetan Plateau, China, *Rangeland J.*, 37, 181-190, doi:10.1071/RJ14062, 2015.
- 519 Swift, M. J., Heal, O. W. and Anderson, J. M.: *Decomposition in terrestrial ecosystems*, Blackwell, Cambridge,  
520 Mass, 1979.
- 521 Takar, A. A., Dobrowolski, J. P. and Thurow, T. L.: Influence of grazing, vegetation life-form, and soil type on  
522 infiltration rates and interrill erosion on a Somalian [Somalian] rangeland, *J. Range. Manage.*, 43, 486-490,  
523 doi:10.2307/4002350, 1990.
- 524 Vaieretti, M. V., Cingolani, A. M., Harguindeguy, N. P. and Cabido, M.: Effects of differential grazing on  
525 decomposition rate and nitrogen availability in a productive mountain grassland, *Plant Soil*, 371, 675-691,  
526 doi:10.1007/s11104-013-1831-9, 2013.

- 
- 527 van Soest, P. J., Robertson, J. B., Lewis, B.A.: Methods for dietary fiber, neutral detergent fiber, and nonstarch  
528 polysaccharides in relation to animal nutrition, *J. Dairy Sci.*, 74, 3583-3597, doi:10.3168/jds. S0022-0302(91)  
529 78551-2, 1991.
- 530 Wardle, D., Bonner, K. and Barker, G.: Linkages between plant litter decomposition, litter quality, and vegetation  
531 responses to herbivores, *Funct. Ecol.*, 16, 585-595, doi:10.1046/j.1365-2435.2002.00659.x, 2002.
- 532 Wen, L., Dong, S. K., Zhu, L., Li, X. Y., Shi, J. J., Wang, Y. L. and Ma, Y. S.: The construction of grassland  
533 degradation index for alpine meadow in Qinghai-Tibetan Plateau, *Procedia Environ. Sci.*, 2, 1966-1969,  
534 doi:10.1016/j.proenv.2010.10.210, 2010.
- 535 Wu, G. L., Du, G. Z., Liu, Z. H. and Thirgood, S.: Effect of fencing and grazing on a Kobresia-dominated meadow  
536 in the Qinghai-Tibetan Plateau, *Plant Soil*, 319, 115-126, doi:10.1007/s11104-008-9854-3, 2009.
- 537 Wu, G. L., Liu, Z. H., Zhang, L. and Chen, J. M.: Long-term fencing improved soil properties and soil organic  
538 carbon storage in an alpine swamp meadow of western China, *Plant Soil*, 332, 331-337, doi:10.1007/s11104-  
539 010-0299-0, 2010.
- 540 Zhang, D. Q., Hui, D. F., Luo, Y. Q. and Zhou G. Y.: Rates of litter decomposition in terrestrial ecosystems:  
541 global patterns and controlling factors, *J Plant Ecol.*, 1, 85-93, doi:10.1093/jpe/rtn002, 2008.
- 542 Zhu, W. Y., Wang, J. Z., Zhang, Z. H., Ren F., Chen L. T. and He, J. S.: Changes in litter quality induced by  
543 nutrient addition alter litter decomposition in an alpine meadow on the Qinghai-Tibet Plateau, *Sci. Rep.UK*,  
544 6, 34290, doi:10.1038/srep34290, 2016.
- 545
- 546
- 547
- 548

549 **Table titles**

550 **Table 1.** Initial chemical characteristics (mean  $\pm$  SE) of litter collected grazing paddocks (GP-litter) and grazing  
551 exclusion paddocks (GEP-litter). Unit of chemical characteristics is mg/g litter for C, N, P, lignin, cellulose and  
552 hemicellulose. Different letters in each row indicate significant difference (ANOVA:  $P < 0.05$ ).

553  
554 **Table 2.** Litter decay rate ( $k$ ,  $\text{g} \cdot 10 \text{ g}^{-1} \cdot \text{day}^{-1}$ ) in different incubation environments. GP-GP, mixed litter was  
555 collected from grazing paddocks (GP) and incubated in GP; GEP-GEP, mixed litter was collected from grazing  
556 exclusion paddocks (GEP) and incubated in GEP; GEP-GP, mixed litter was collected from GEP and incubated  
557 in GP; GP-GEP, mixed litter was collected from GP and incubated in GEP.  $k$  values followed by different letters  
558 are significantly different (non-overlap of 83.4 % CL). The  $R^2$ , F and P are estimated from the negative exponential  
559 model of Swift et al. (1979).

560  
561 **Table 3.** Contribution (%) of incubation site (Site: GP, grazing paddocks; GEP, grazing exclusion paddocks) and  
562 litter quality (Quality: GP-litter, mixed litter collected from grazing paddocks; GEP-litter, mixed litter collected  
563 from grazing exclusion paddocks) to litter decomposition and N release.

564

565 **Supplemental table title**

566 **Table S1.** The list of all species in grazing and grazing exclusion paddocks (Niu et al., 2009, 2010; Wu et al.,  
567 2009).

568

569

570

571

572

573 **Figure captions**

574 **Figure 1.** Mean ( $\pm$  SE) annual biomass of litter collected from grazing paddocks (GP) and grazing exclusion  
575 paddocks (GEP). For each category, columns with different letters are significantly different (ANOVA:  $P < 0.05$ ).

576

577 **Figure 2.** Mean ( $\pm$  SE) soil total nitrogen (TN) (a), soil total phosphorous (TP) (b), and soil organic carbon (SOC)  
578 (c) between the grazing paddocks (GP) and grazing exclusion paddocks (GEP). Significant difference was only  
579 found between GP and GEP for SOC in 2012 (LSD test:  $P < 0.05$ ).

580

581 **Figure 3.** Dynamics (mean  $\pm$  SE) of litter decomposition (a) and N lease (b) on the QTP. GP-GP, mixed litter was  
582 collected from grazing paddocks (GP) and incubated in GP; GEP-GEP, mixed litter was collected from grazing  
583 exclusion paddocks (GEP) and incubated in GEP; GEP-GP, mixed litter was collected from GEP and incubated  
584 in GP; GP-GEP, mixed litter was collected from GP and incubated in GEP. Grey lines under months indicate the  
585 mean air temperatures  $< 0$  °C.

586

587 **Figure 4.** Percentage of litter mass (a) and total N remaining (b) at the end of experiments. GP-GP, mixed litter  
588 was collected from grazing paddocks (GP) and incubated in GP; GEP-GEP, mixed litter was collected from  
589 grazing exclusion paddocks (GEP) and incubated in GEP; GEP-GP, mixed litter was collected from GEP and  
590 incubated in GP; GP-GEP, mixed litter was collected from GP and incubated in GEP. Vertical bars are the least  
591 significant different (LSD) values. Columns with the different letters are significantly different (LSD test:  $P <$   
592  $0.05$ ).

593

594

595 **Supplemental figure captions**

596 **Figure S1.** Mean temperature (°C) and total precipitation (mm) during experiments.

597

598 **Figure S2.** Field sampling methods: **(a)** half alongside, **(b)** half along diagonal, **(c)** two sub-quarters along  
599 diagonal, and **(d)** additional quarter for supplementary litter collection to make up 20 g in quarter **a**, **b** or **c**.
